# Supplementary material
Source: PubMed Central journal article supplement (PMC1635459)
Supplement: rspb20063633s05.pdf [file rspb20063633s05.pdf]

Summary of studies for which NVP rates were collated and related to dietary data

| Country      | Study                              | Year of data collection | NVP rate (%) | Sample size (n) |
|--------------|------------------------------------|-------------------------|--------------|-----------------|
| Australia    | Abraham et al (1994)               | 1994                    | 62.0         | 100             |
| Australia    | Biggs (1975)                       | 1975                    | 63.0         | 116             |
| Australia    | Krickler et al (1986)              | 1970-1981               | 71.0         | 429             |
| Canada       | Drake et al (1988)                 | 1988                    | 65.0         | 20              |
| Canada       | McBride et al (1991)               | 1982-1984               | 67.0         | 732             |
| Ecuador      | Weigel et al (2000)                | 1996                    | 67.0         | 1000            |
| Greece       | Iatrakis et al (1988)              | 1988                    | 63.0         | 102             |
| Hungary      | Czeizel & Puho (2004)              | 1980-1996               | 53.0         | 38151           |
| India        | Anath & Rao (1993)                 | 1977                    | 35.0         | 2500            |
| Israel       | Medalie (1957)*                    | 1950-1952               | 71.0         | 100             |
| Israel       | Shirin et al (2004)                | 2000                    | 72.0         | 185             |
| Italy        | Chatenoud et al (1998)             | 1993-1995               | 60.0         | 1097            |
| Japan        | Mori et al (1988)                  | 1988                    | 84.0         | 132             |
| Kenya        | Pike (2000)                        | 2000                    | 44.0         | 54              |
| Korea        | Lee et al (2004)                   | 2000-2002               | 90.0         | 143             |
| Netherlands  | Paarlberg et al (1996)             | 1996                    | 48.0         | 396             |
| Nepal        | Christian et al (1998)             | 1997                    | 48.0         | 120             |
| Norway       | Corey et al (1992)*                | 1915-1960               | 64.1         | 22241           |
| Saudi Arabia | al-Kanhal & Bani (1995)            | 1991                    | 28.0         | 321             |
| South Africa | Walker et al (1985)                | 1985                    | 60.0         | 1771            |
| Sri Lanka    | Wijewardene et al (1994)           | 1989                    | 47.0         | 1000            |
| Sweden       | Järnfelt-Samsioe et al (1983)      | 1980-1981               | 70.0         | 948             |
| Sweden       | Järnfelt-Samsioe et al (1985)      | 1985                    | 62.0         | 102             |
| Sweden       | Järnfelt-Samsioe (1987)            | 1987                    | 60.0         | 43              |
| Sweden       | Kullander & Källén (1976)          | 1963-1965               | 72.0         | 5377            |
| Sweden       | Uddenberg et al (1971)             | 1970                    | 69.0         | 152             |
| Tanzania     | Walraven et al (1997)              | 1989-1990               | 15.0         | 2142            |
| UK           | Baylis et al (1983)                | 1983                    | 92.0         | 36              |
| UK           | Davies et al (1986)                | 1978                    | 90.0         | 212             |
| UK           | Diggory & Tomkinson (1962)         | 1962                    | 88.0         | 100             |
| UK           | Evans et al (1985)                 | 1985                    | 83.0         | 342             |
| UK           | Fairburn & Welch (1990)            | 1989                    | 70.0         | 50              |
| UK           | Fitzgerald (1984)                  | 1978-1979               | 73.3         | 86              |
| UK           | MacIntyre (1983)                   | 1983                    | 94.0         | 50              |
| UK           | Masson et al 1992                  | 1992                    | 59.0         | 116             |
| UK           | Meyer et al (1994)                 | 1982-1984               | 79.0         | 1513            |
| UK           | Robinson et al (1996)              | 1991-1992               | 86.0         | 569             |
| UK           | Stewart et al (1988)               | 1988                    | 69.0         | 242             |
| UK           | Vellacott et al (1988)             | 1988                    | 67.0         | 500             |
| UK           | Wolkind & Zajicek (1978)           | 1977                    | 53.1         | 96              |
| USA          | Brandes (1967)*                    | 1960-1963               | 72.9         | 7111            |
| USA          | Brown et al. (1997)                | 1989-1994               | 79.4         | 549             |
| USA          | Crystal et al (1999)               | 1994-1994               | 85.3         | 129             |
| USA          | Dilorio (1985)                     | 1985                    | 56.0         | 78              |
| USA          | Fawcett & York (1986)              | 1986                    | 68.0         | 70              |
| USA          | Jenkins & Shelton (1989)           | 1989                    | 67.0         | 55              |
| USA          | Klebanoff et al (1985)*            | 1959-1966               | 56.0         | 9098            |
| USA          | Little & Hook (1979)               | 1979                    | 72.0         | 210             |
| USA          | Milkovich and van den Berg (1967)* | 1959-1966               | 58.0         | 11481           |
| USA          | Pettiti (1986)                     | 1981-1982               | 71.0         | 1933            |
| USA          | Rodin & Radke-Sharpe (1991)        | 1991                    | 79.0         | 80              |
| USA          | Schuster et al (1985)              | 1985                    | 67.0         | 180             |
| USA          | Speert & Guttmacher (1954)*        | 1954                    | 70.0         | 285             |
| USA          | Tierson et al (1986)               | 1976-1977               | 89.4         | 414             |
| USA          | Weigel & Weigel (1989a)            | 1983-1984               | 69.0         | 903             |
| USA          | Yerushalmy & Milkovich (1965)*     | 1960-1964               | 71.0         | 3853            |

(\*These seven studies are dropped from selected analyses because data were collected before 1961 (when FAOSTAT data collection began)).

## References

- Abraham, S., King, W. & Llewellyn-Jones, D. 1994 Attitudes to body weight, weight gain and eating behaviour in pregnancy. *Journal of Psychosomatic Obstetrics and Gynecology*. **15**, 189-195.
- al-Kanhal, M. A. & Bani, I. A. 1995 Food habits during pregnancy among Saudi women. *International Journal of Vitamin and Nutrition Research*. **65**, 206-10.
- Anath, C. V. & Rao, P. S. S. 1993 Epidemiology of nausea and vomiting of pregnancy and its relation to fetal outcome in a rural area. *Journal of Tropical Paediatrics*. **39**, 313.
- Baylis, J. M., Leeds, A. R. & Challacombe, D. N. 1983 Persistent nausea and food aversions in pregnancy. *Clinical Allergy* **13**, 263-269.
- Biggs, J. S. G. 1975 Vomiting in pregnancy: Causes and management. *Drugs* **9**, 299-306.
- Brandes, J. M. 1967 First trimester nausea and vomiting as related to outcome of pregnancy. *Obstetrics and Gynecology*. **30**, 427-431.
- Brown, J. E., Kahn, E. S. & Hartman, T. J. 1997 Profet, profits and proof: Do nausea and vomiting of early pregnancy protect women from "harmful" vegetables? *American Journal of Obstetrics and Gynecology*. **176**, 179-181.
- Chatenoud, L., Parazzini, F., Di Cintio, E., Zanconato, G., Benzi, G., Bortolus, R. & La Vecchia, C. 1998 Paternal and maternal smoking habits before conception and during the first trimester: Relation to spontaneous abortion. *Annual Epidemiology*. **8**, 520-526.
- Christian, P., West, K. P., Khatry, S. K., Katz, J., Shrestha, S. R., Pradham, E. K., LeClerq, S. C. & Pokhrel, R. K. 1998 Night blindness of pregnancy in rural Nepal – nutritional and health risks. *International Journal of Epidemiology*. **27**, 231-237.
- Corey, L. A., Berg, K., Solaas, M. H. & Nance, W. E. 1992 The epidemiology of pregnancy complications and outcome in a Norwegian twin population. *Obstetrics and Gynecology*. **60**, 989-994.
- Crystal, S. R., Bowen, D. J. & Bernstein, I. L. 1999 Morning sickness and salt intake, food cravings and food aversions. *Physiology and Behaviour*. **67**, 181-187.
- Czeizel, A. E. & Puho, E. 2004 Association between severe nausea and vomiting in pregnancy and lower rate of preterm births. *Paediatric and Perinatal Epidemiology*. **18**, 253-259.
- Davies, T. W., Williams, D. R. R. & Whitaker, R. H. 1986 Risk factors in undescended testis. *International Journal of Epidemiology*. **15**, 197-201.
- Diggory, P. L. C. & Tomkinson, J. S. 1962 Nausea and vomiting in pregnancy: A trial of meclozine dihydrochloride with and without pyridoxine. *The Lancet*. **25**, 370-372.
- Dilorio, C. 1985 First trimester nausea in pregnant teenagers: Incidence, characteristics and intervention. *Nursing Research*. **34**, 372-374.
- Drake, M. L., Verhulst, D. & Fawcett, J. 1988 Physical and psychological symptoms experienced by Canadian women and their husbands during pregnancy and the postpartum. *Journal of Advanced Nursing*. **13**, 436-440.
- Evans, A. J., Li, T. C., Selby, C. & Jeffcoate, W. J. 1986 Morning sickness and thyroid function. *British Journal of Obstetrics and Gynaecology*. **93**, 520-522.
- Fairburn, C. G. & Welch, S. L. 1990 The impact of pregnancy on eating habits and attitudes to shape and weight. *International Journal of Eating Disorders*. **9**, 153-160.

- Fawcett, J. & York, R. 1985 Spouses' physical and psychological symptoms during pregnancy and the postpartum. *Nursing Research*. **35**, 145-148.
- FitzGerald, C. M. 1984 Nausea and vomiting in pregnancy. *The British Journal of Medical Psychology*. **57**, 159-165.
- Iatrakis, G. M., Sakellaropoulos, G. G., Kourkoubas, A. H. & Kabounia, S. E. 1988 Vomiting and nausea in the first 12 weeks of pregnancy. *Psychotherapy & Psychosomatics*. **49**, 22-24.
- Järfelt-Samsioe, A. 1987 Nausea and vomiting in pregnancy: A review. *Obstetrical and Gynecological Survey*. **41**, 422-426.
- Järfelt-Samsioe, A., Eriksson, B., Waldenstrom, J. & Samsioe, G. 1985 Some new aspects on emesis gravidarum. Relations to clinical data, serum electrolytes, total protein and creatinine. *Gynecological and Obstetric Investigation*. **19**, 174-186.
- Järfelt-Samsioe, A., Samsioe, G. & Velinder, G.-M. 1983 Nausea and vomiting in pregnancy – A contribution to its epidemiology. *Gynecological and Obstetric Investigation*. **16**, 221-229.
- Jenkins, M. L. & Shelton, B. J. 1989 The effectiveness of self-care actions in reducing “morning sickness”. In *Key Aspects of Comfort: Management of pain, fatigue, & nausea*. (ed. S. G. Funk), pp. 267-272. New York: Springer.
- Klebanoff, M. A., Koslowe, P. A., Kaslow, R. & Rhoads, G. G. 1985 Epidemiology of vomiting in early pregnancy. *Obstetrics & Gynecology*. **66**, 612-616.
- Klebanoff, M. A., Levine, R. J., DerSimonian, R., Clemens, J. & Wilkins, D. G. 1999 Maternal serum paraxanthine, a caffeine metabolite, and the risk of spontaneous abortion. *New England Journal of Medicine* **341**, 1639-1644.
- Kricker, A., Elliot, J., Forrest, J. & McCredie, J. 1986 Congenital limb deficiency: Maternal factors in pregnancy. *Australia and New Zealand Journal of Obstetrics and Gynecology* **26**, 272-275.
- Kullander, S. & Kallen, B. 1976 A prospective study of drugs and pregnancy. *Acta Obstetrica et Gynecologica Scandinavica*. **55**, 105-111.
- Lee, J. I., Lee, J. A. & Lim, H. S. 2003 Morning sickness reduces dietary diversity, nutrient intakes, and infant outcome of pregnant women. *Nutrition Research* **24**, 531-540.
- Little, R. E. & Hook, E. B. 1979 Maternal alcohol and tobacco consumption and their association with nausea and vomiting during pregnancy. *Acta Obstetrica et Gynecologica Scandinavica*. **58**, 15-17.
- MacIntyre, S. 1983 The management of food in pregnancy. In *The Sociology of Food and Eating* (ed. Murcott & Aldershot), pp. 57-72. Aldershot, UK: Gower Publishing.
- Masson, G. M., Anthony, F. & Chau, E. 1985 Serum chorionic gonadotrophin (hCG), schwangerschaftprotein 1 (SP1), progesterone and estradiol levels in patients with nausea and vomiting in early pregnancy. *British Journal of Obstetrics and Gynaecology*. **92**, 211-215.
- McBride, M. L., Van Den Steen, N., Lamb, C. W. & Gallagher, R. P. 1991 Maternal and gestational factors in cryptorchidism. *International Journal of Epidemiology*. **20**, 964-970.
- Medalie, J. H. 1954 Relationship between nausea and or vomiting in early pregnancy and abortion. *The Lancet* **2**, 117-119.
- Meyer, L. C., Peacock, J. L., Bland, J. M. & Anderson, H. R. 1994 Symptoms and health problems in pregnancy: their association with social factors, smoking,

- alcohol, caffeine and attitude to pregnancy. *Paediatric and Perinatal Epidemiology*. **8**, 145-155.
- Milkovich, L. & van den Berg, B. J. 1975 An evaluation of the teratogenicity of certain antinauseant drugs. *American Journal of Obstetrics and Gynecology*. **125**, 244-248.
- Mori, M., Amino, N., Tamaki, H., Miyai, K. & Tanizaw, O. 1988 Morning sickness and thyroid function in normal pregnancy. *Obstetrics & Gynecology*. **72**, 355-359.
- Paarlberg, K. M., Vingerhoets, A. J. J. M., Passchier, J., Heinen, A. G. J. J., Dekker, G. A. & van Geijn, H. P. 1996 Psychosocial factors as predictors of maternal well-being and pregnancy-related complaints. *Journal of Psychosomatic Obstetrics and Gynecology*. **17**, 93-102.
- Pettiti, D. B. 1986 Nausea and pregnancy outcome. *Birth* **13**, 223-226.
- Pike, I. L. 2000 The nutritional consequences of pregnancy sickness: A critique of a hypothesis. *Human Nature* **11**, 207-232.
- Robinson, S., Godfrey, K., Osmond, C., Cox, V. & Barker, D. 1996 Evaluation of a food frequency questionnaire used to assess nutrient intakes in pregnant women. *European Journal of Clinical Nutrition* **50**, 302-308.
- Rodin, J. & Radke-Sharpe, N. 1991 Changes in appetitive variables as a function of pregnancy. In *Chemical Senses, Appetite and Nutrition* (ed. M. I. Freidman), pp. 325-340. New York: Marcel Dekker.
- Schuster, K., Bailey, L. B., Dimpero, D. & Mahan, C. S. 1985 Morning sickness and vitamin B6 status of pregnant women. *Human Nutrition: Clinical Nutrition* **39**, 75-79.
- Shirin, H., Sadan, O., Shevah, O., Bruck, R., Boaz, M., Moss, S. F., Everon, S., Glezerman, M. & Avni, Y. 2004 Positive serology for *Helicobacter pylori* and vomiting in the pregnancy. *Archives of Gynecology Obstetrics* **270**, 10-14.
- Speert, H. & Guttmacher, A. F. 1954 Frequency and significance of bleeding in early pregnancy. *Journal of American Medical Association*. **155**, 712-715.
- Stewart, J., Wheeler, E. & Schofield, C. 1987 Regional differences in British attitudes to diet in pregnancy: Priorities and pragmatism. *Ecology of Food and Nutrition* **20**, 211-229.
- Tierson, F. D., Olsen, C. L. & Hook, E. B. 1986 Nausea and vomiting of pregnancy and association with pregnancy outcome. *American Journal of Obstetrics & Gynecology*. **155**, 1017-1022.
- Uddenburg, N., Nilsson, A. & Almgren, P. E. 1971 Nausea in pregnancy: Psychological and psychosomatic aspects. *Journal of Psychosomatic Research*. **15**, 269-276.
- Vellacott, I. D., Cooke, E. J. A. & James, C. E. 1988 Nausea and vomiting in early pregnancy. *International Journal of Gynecology & Obstetrics*. **26**, 57-62.
- Walker, A. R. P., Walker, B. F., Jones, J., Verardi, M. & Walker, C. 1985 Nausea and vomiting and dietary cravings and aversions during pregnancy in South African women. *British Journal of Obstetrics and Gynecology*. **92**, 484-489.
- Walraven, G. E. L., Mkanje, R. J. B., van Asten, H. A. G. H., van Roosmalen, J., van Dongen, P. W. J. & Dolman, W. M. V. 1997 The aetiology of low birthweight in a rural area of Tanzania. *Tropical Medicine & International Health*. **2**, 558-567.
- Weigel, M. M., Caiza, M. E., Lascano, Y., Barreno, G. & Mosquera, L. 2000 Early pregnancy nausea and vomiting in a high-altitude Andean population. *International Journal of Gynecology and Obstetrics*. **69**, 9-21.

- Weigel, R. M. & Weigel, M. M. 1989 Nausea and vomiting of early pregnancy and pregnancy outcome. An epidemiological study. *British Journal of Obstetrics and Gynaecology*. **96**, 1304-11.
- Wijewardene, K., Fonseka, P. & Goonaratne, C. 1994 Dietary cravings and aversions during pregnancy. *Indian Journal of Public Health*. **38**, 95-98.
- Wolkind, S. & Zajicek, E. 1978 Psycho-social correlates of nausea and vomiting in pregnancy. *Journal of Psychosomatic Research*. **22**, 1-5.
- Yerushalmy, J. & Milkovich, L. 1965 Evaluation of the teratogenic effect of meclizine in man. *American Journal of Obstetrics and Gynecology*. **93**, 553-562.
